# Supplementary material
Source: PubMed Central journal article supplement (PMC10654682)
Supplement: NIHMS1942359-supplement-2.pdf [file NIHMS1942359-supplement-2.pdf]

**SUPPORTING INFORMATION**

The Supporting Information is available free of charge on the ACS Publications website at DOI:

Procedures and spectroscopic data (PDF).
